# Supplementary material for: Toward hemocompatible self-assembling antimicrobial nanofibers: understanding the synergistic effect of supramolecular structure and PEGylation on hemocompatibility
Source: Royal Society of Chemistry journal article supplement (doi:10.1039/c5ra24553b), 2016-01-01
Supplement: c5ra24553b1.pdf [file c5ra24553b1.pdf]

## Supporting Information for

### **Toward Hemocompatible Self-assembling Antimicrobial Nanofibers: Understanding the Synergistic Effect of Supramolecular Structure and PEGylation on Hemocompatibility**

Dawei Xu,<sup>a‡</sup> Qian Ran,<sup>b‡</sup> Yang Xiang,<sup>b</sup> Linhai, Jiang,<sup>a</sup> Britannia M. Smith,<sup>c</sup> Fadi Bou-  
Abdallah,<sup>c</sup> Reidar Lund,<sup>d</sup> Zhongjun Li,<sup>b\*</sup> He Dong<sup>a\*</sup>

<sup>a</sup> Department of Chemistry and Biomolecular Science, Clarkson University, Potsdam, NY

<sup>b</sup> Department of Blood Transfusion, the Second Affiliated Hospital, the Third Military  
Medical University, Chongqing, China

<sup>c</sup> Department of Chemistry, State University of New York at Potsdam, Potsdam, NY

<sup>d</sup> Department of Chemistry, University of Oslo, Oslo, Norway

\*Corresponding author: [hdong@clarkson.edu](mailto:hdong@clarkson.edu), [johnneyusc@gmail.com](mailto:johnneyusc@gmail.com)

<sup>‡</sup> The authors made equal contribution to the work

**Materials and supplies.** MBHA rink amide resin, Fmoc-protected amino acids, 2-(6-Chloro-1-H-benzotriazole-1-yl)-1,1,3,3-tetramethylaminium hexafluorophosphate (HCTU) were purchased from Novabiochem. Piperidine, 5(6)-Carboxyfluorescein (FAM), N-acetylcysteine (NAC) and N-2-hydroxyethylpiperazine-N-2-ethane-sulfonic acid (HEPES) was purchased from Sigma-Aldrich. PEG750-COOH was purchased from Rapp Polymere. All other reagents and solvents for peptide synthesis and purification were purchased from Fisher Scientific and used as received. Annexin-V-FLUOS was provided by Roche (Germany). Fluo-3/AM was supplied by Invitrogen (USA). 2',7'-dichlorofluorescein diacetate (DCFH-DA) was purchased from Beyotime (China). Fetal bovine serum (FBS) was purchased from Gibco (AU). Penicillin-Streptomycin and L-Glutamine were provided by Gibco (USA).

**CD spectroscopy.** MDPs were dissolved and diluted in Tris buffer (pH 7.4, 20 mM) to reach a final concentration of 100  $\mu$ M for CD measurements (Jasco-J715 spectrometer). Samples were loaded in a 1 mm cuvette and the data were collected from 250 nm to 190 nm at room temperature with a scan rate of 100 nm/min, a response time of 2 sec and a bandwidth of 1 nm. Final spectra were an average of three scans. Ellipticity measured in mDeg was converted to molar residual ellipticity via the formula  $\theta = (\text{mDeg} * 1000) / (c * n * l)$ , where c is the concentration of the peptide solution expressed in mM, n is the number of amino acids in the peptide sequence and l is the path length of the cell used in mm. Temperature dependent CD experiment was performed by monitoring the ellipticity at 205 nm from 5 °C to 95 °C with a heating rate of 0.5 °C/min. The transition temperature was determined by applying first derivative function on the melting curve.

**Negatively stained TEM.** MDPs were dissolved and diluted in Tris buffer (pH=7.4, 20 mM) to reach a final concentration of 100  $\mu$ M. 10  $\mu$ l peptide solution was dropped onto a holey carbon grid (TED PELLA 01824). After 1 min, the excess solution was carefully removed with filter paper and the sample was stained by adding 10  $\mu$ l of 2 wt% uranyl acetate solution for 1 min. The excess staining solution was removed with filter paper and the TEM sample was allowed to dry for overnight before imaging on a JEOL 2010 high-resolution transmission electron microscope.

**SAXS Characterization.** The SAXS experiments were performed using the automated BM29 bioSAXS beamline at the ESRF, Grenoble, France. Technical details were referred to the established literature protocol.<sup>1</sup> The data were obtained using an energy of 12.5 keV and a detector distance 2.87 m covering a Q-range ( $Q=4\pi \sin (\theta/2)/\lambda$ ,  $\lambda$  is the wavelength,  $\theta$  is the scattering angle) of about  $0.0047 \text{ \AA}^{-1} < Q < 0.5 \text{ \AA}^{-1}$ . The data were calibrated to absolute intensity scale using water as a primary standard. The data were analysed using the Indirect Fourier transform (IFT)<sup>2</sup> routine implemented in the data program GNOM in the ATSAS package.<sup>3</sup> This model-independent approach allows the pair distribution function,  $p(r)$ , describing the correlation between pairs of scattering points to be determined.

**Erythrocyte preparation.** All human subjects involved in the study were approved through written informed consent by the Medical Ethics Committee of the Second Affiliated Hospital affiliated with the Third Medical University. Leukocyte-free erythrocytes from healthy donors were used shortly after donation (stored no more than 24 hrs) and were provided by the Chongqing Blood Center. Hematocrit was adjusted to 0.4% with Ringer solution (125 mM NaCl, 32 mM HEPES, 5 mM glucose, 5 mM KCl, 1 mM MgSO<sub>4</sub>, 1 mM CaCl<sub>2</sub>, pH7.4).

**Measurement of intracellular ROS.** HRBCs were incubated with MDPs at varying concentrations for 24 hours at 37°C and 5% CO<sub>2</sub> with 95% humidity. RBCs were washed with Ringer solution for three times followed by incubation with 10  $\mu$ M DCFH-DA in Ringer solution in dark for 30 min at 37°C. Fluorescence intensity were measured by FACS Calibur (BD, USA) in fluorescence channel FL-1 (488 nm excitation and 530 nm emission). The data were analyzed using Flowjo software (Treestar, USA).

**Measurement of cytosolic Ca<sup>2+</sup>.** HRBCs were incubated with MDPs at varying concentrations for 24 hours at 37°C and 5% CO<sub>2</sub> with 95% humidity. RBCs were resuspended in Ringer solution containing 5 mM of CaCl<sub>2</sub>. 5  $\mu$ M of Fluo-3 AM was added to measure cytosolic Ca<sup>2+</sup>. After 30 min incubation at 37°C, RBC was washed three times using Ringer solution containing 5 mM CaCl<sub>2</sub>. Fluorescence intensity of Fluo-3 was measured by FACS Calibur (BD, USA) in fluorescence channel FL-1 (488 nm

excitation and 530 nm emission). The data were analyzed using Flowjo software (Treestar, USA).

**Bacterial culture.** In this work, *E.coli* (25922) was purchased from ATCC and *P. aeruginosa* (15442) *S. aureus* (6538) were ordered from Presque Isle Cultures. All bacteria were cultured in MHB (Fisher) under constant shaking at 100 rpm at 37°C. Bacteria were used upon reaching the mid-exponential growth phase.

**Minimum inhibitory concentration (MIC) measurements.** MICs of P-W362 and P-3W62 against *E.coli*, *P. aeruginosa* and *S. aureus* was measured by following the broth micro-dilution method. First, bacterial suspension was diluted to approximately  $10^5$  CFU/mL in MHB medium. Then, 10  $\mu$ L of peptide solution at varying concentrations (800, 400, 200, 100, 50 and 25  $\mu$ M) was added to 90  $\mu$ L bacterial solution in a 96-well plate. Bacterial suspensions UV absorbance at 600 nm was measured after 18 hrs of incubation for *E. coli* and *P. aeruginosa*, and 36 hrs of incubation for *S. aureus*. The MIC was determined as the minimum concentration of the peptides required to completely inhibit the growth of bacteria by using pure broth as a negative control. Each MIC test was repeated 3 times using 3 replicates.

**Table 1.** MIC results of W362, 3W62, P-W362, and P-3W62 against *E. coli*, *P. aeruginosa* and *S. aureus*.

| Peptide sequence | MIC (μM) |      |      |
|------------------|----------|------|------|
|                  | E.C.     | P.A. | S.A. |
| W362             | 20       | 20   | 10   |
| 3W62             | 80       | 80   | 20   |
| P-W362           | 20       | 20   | 10   |
| P-3W62           | 80       | 80   | 10   |

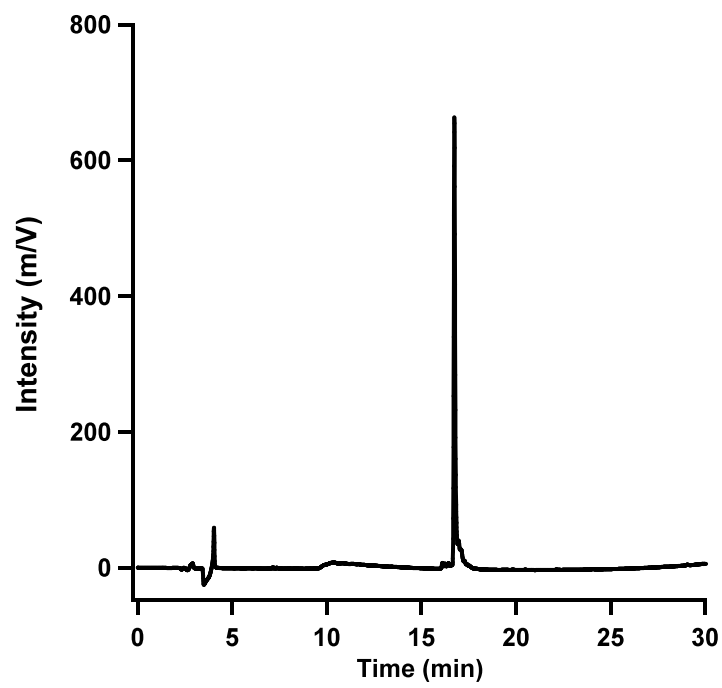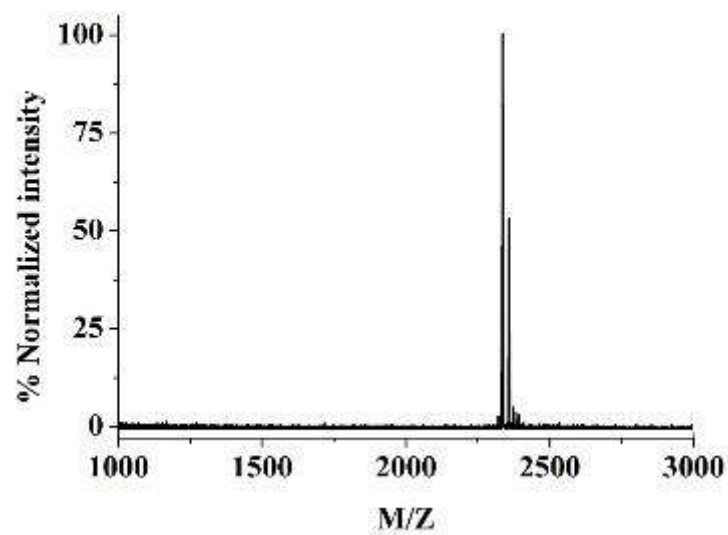

**Figure S1.** (a) HPLC and MALDI spectra of purified W362

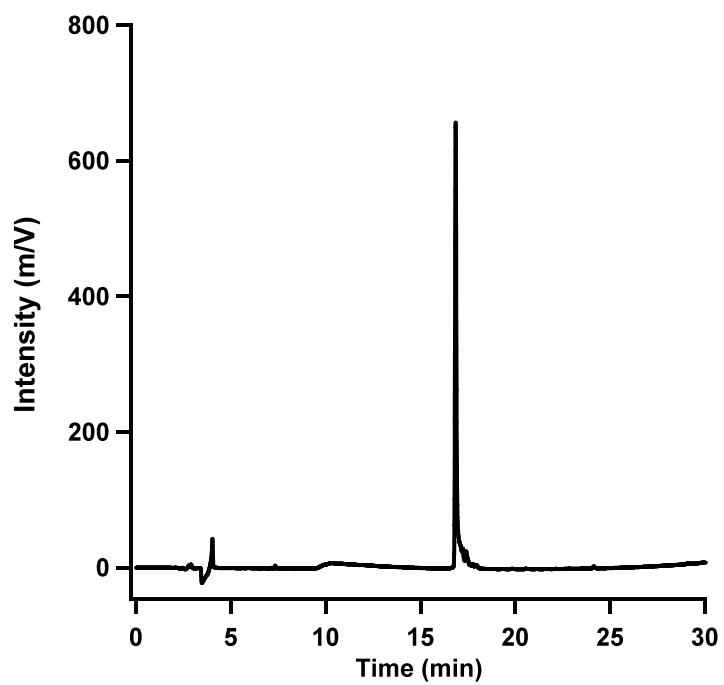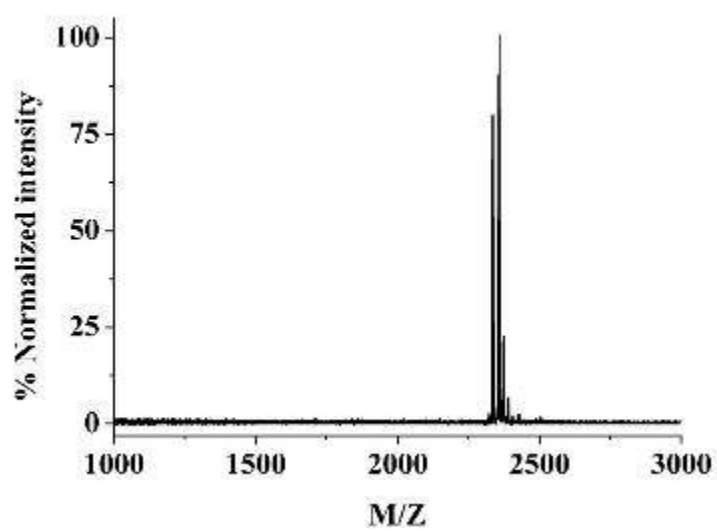

**Figure S1.** (b) HPLC and MALDI spectra of purified 3W62

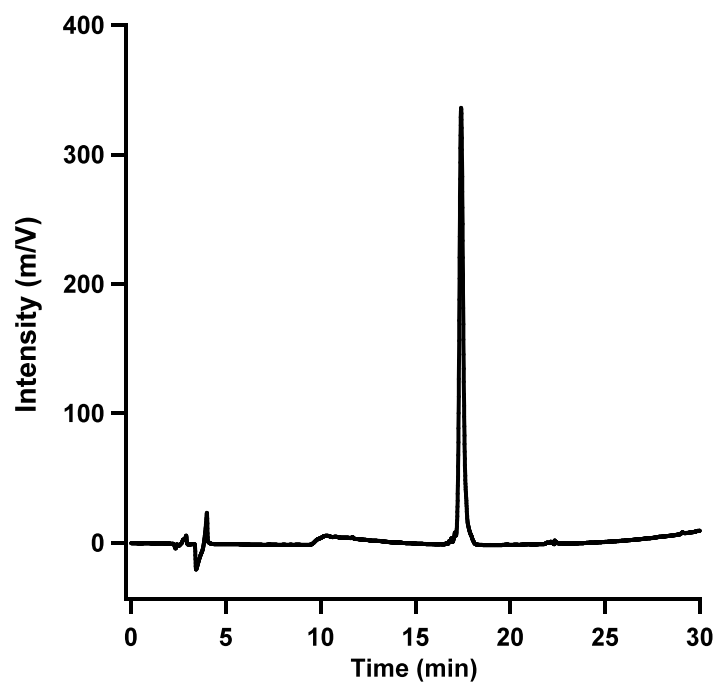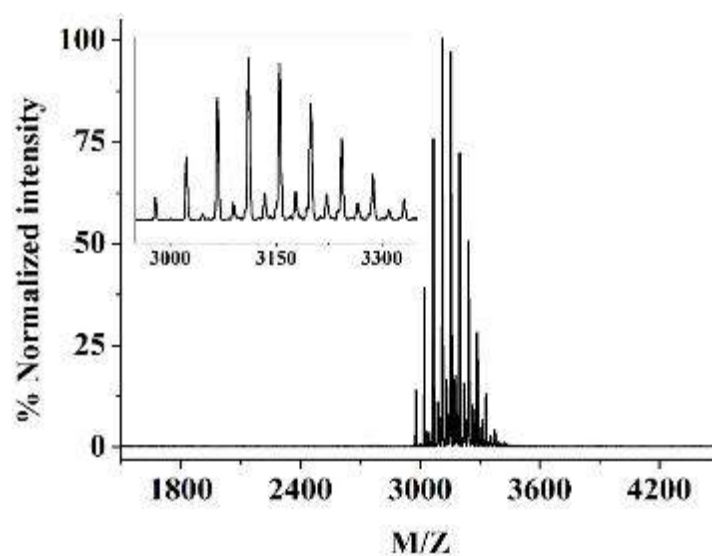

**Figure S1.** (c) HPLC and MALDI spectra of purified P-W362



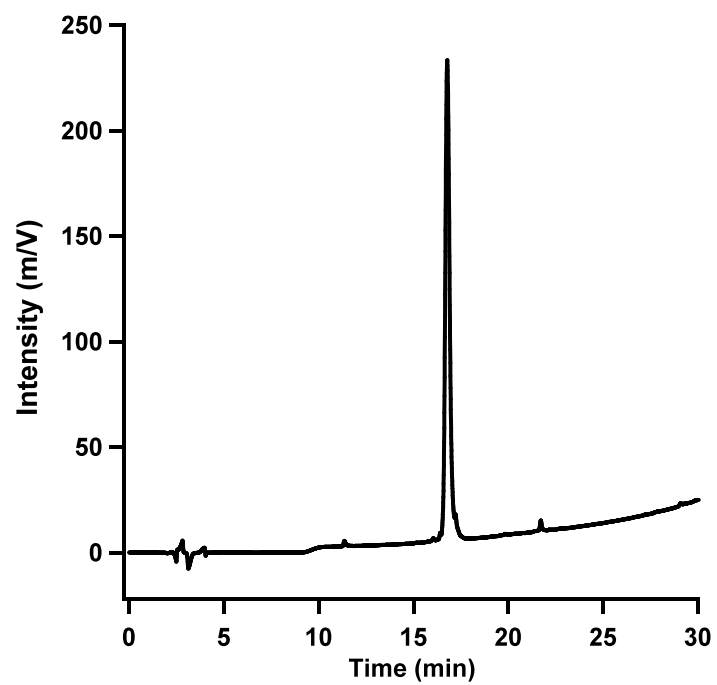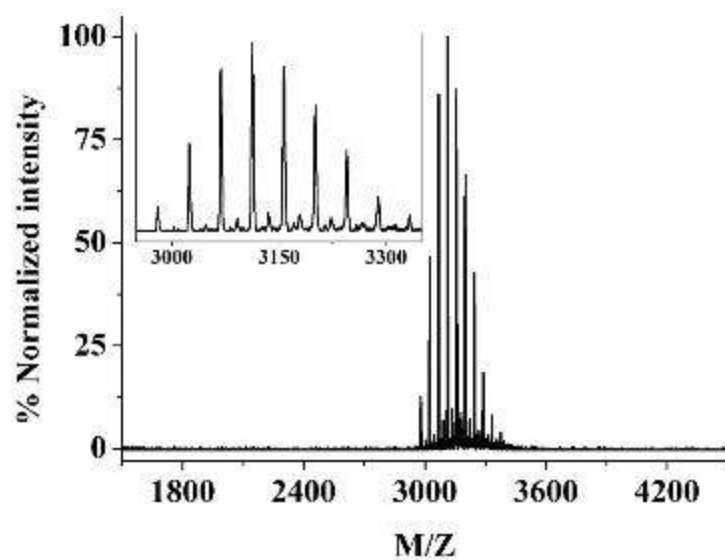

**Figure S1.** (d) HPLC and MALDI spectra of purified P-3W62.

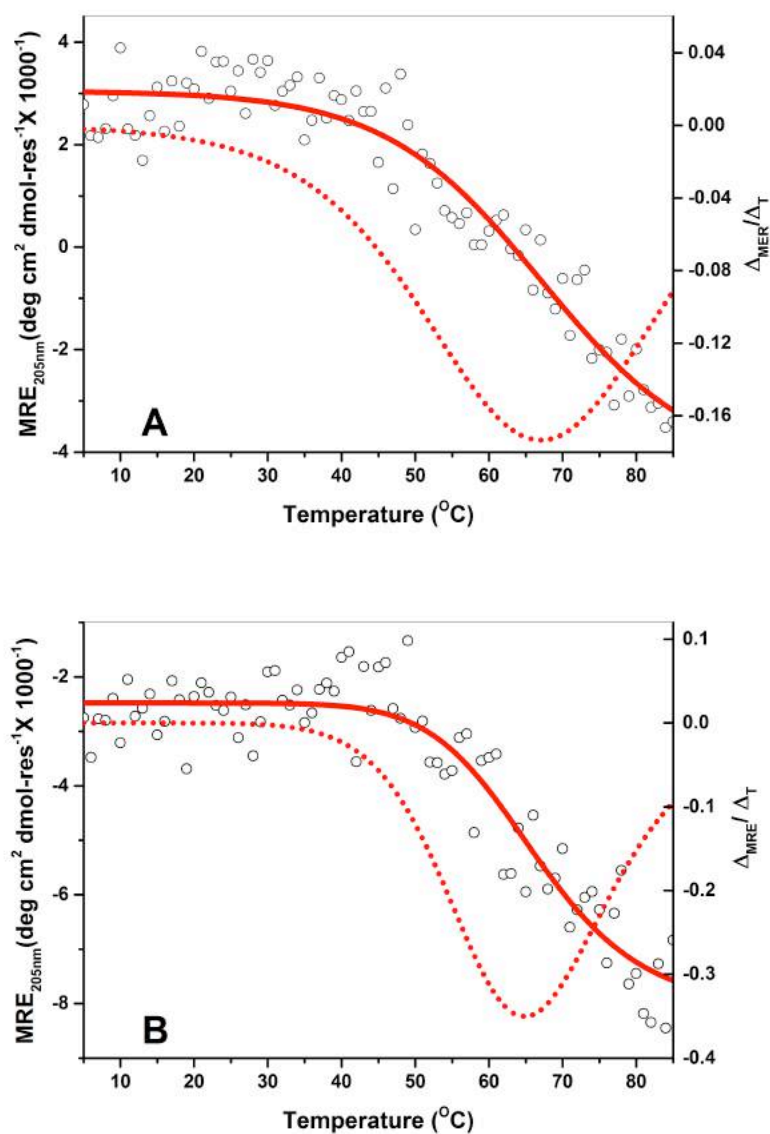

**Figure S2.** Melting curves of 3W62 (top) and P-3W62 (bottom) to qualitatively compare the supramolecular stability of  $\beta$ -sheet nanofibers. Black circle: experimental data by monitoring the ellipticity at 205 nm as a function of temperature. Solid red curve: fitted data. Dashed red curve: first derivative function to determine T<sub>m</sub>. T<sub>m</sub> (3W62) = 67 °C. T<sub>m</sub> (P-3W62) = 65 °C.

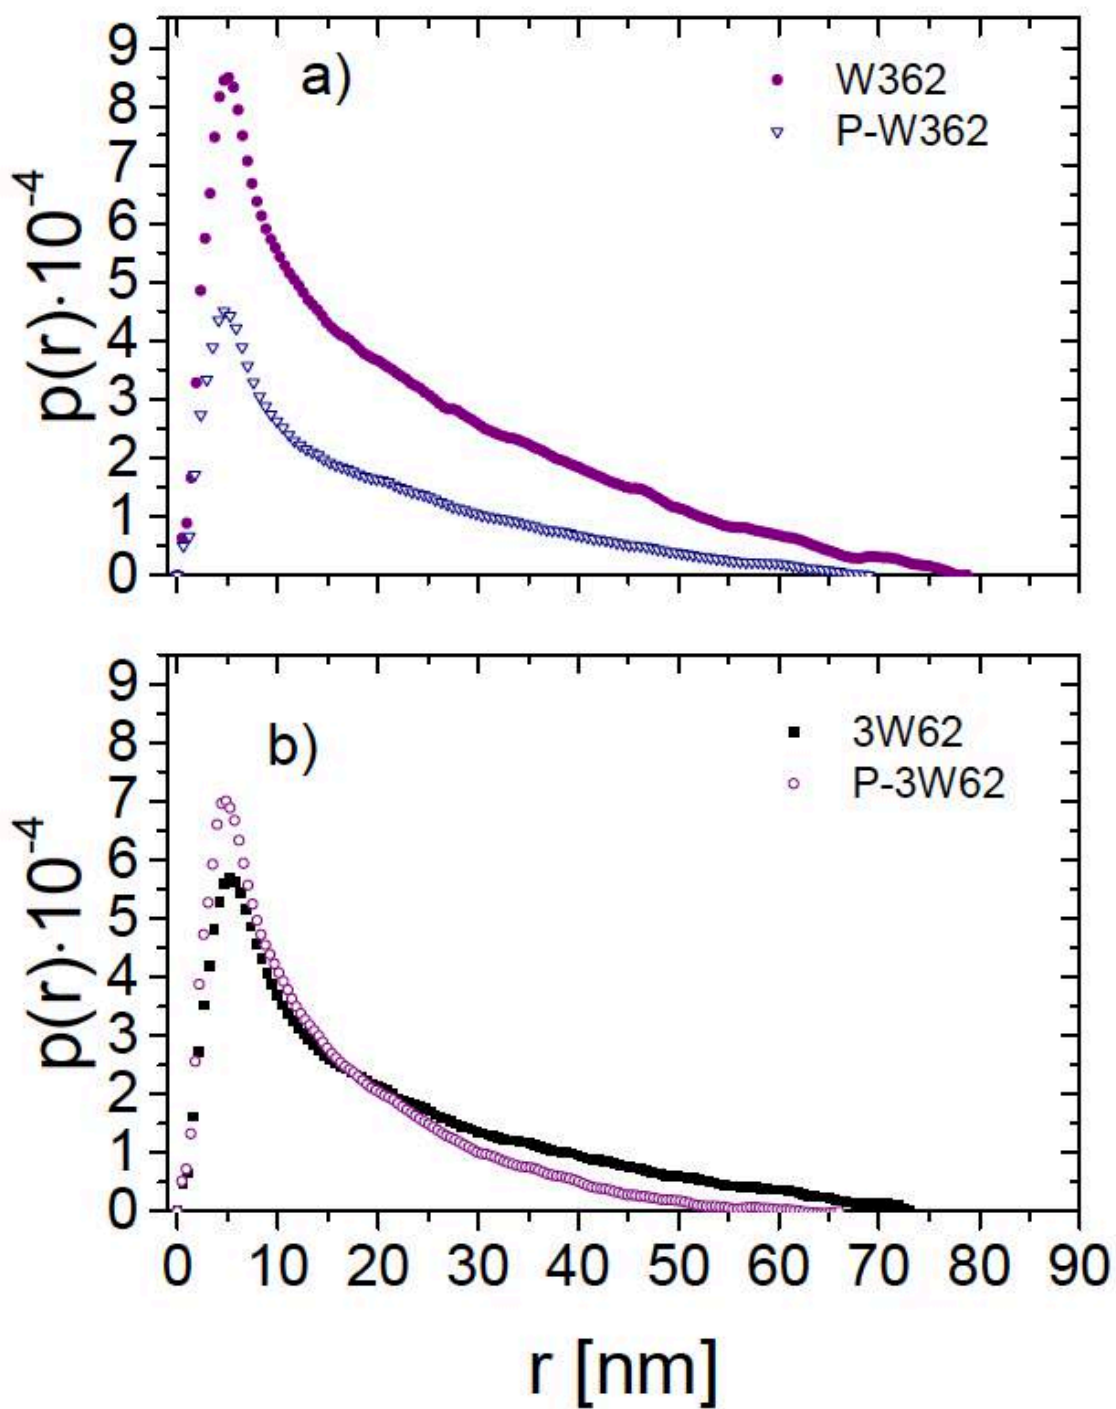

**Figure S3:** The extracted pair distribution function obtained from IFT showing the presence of elongated nanostructure for all MDP assembly.

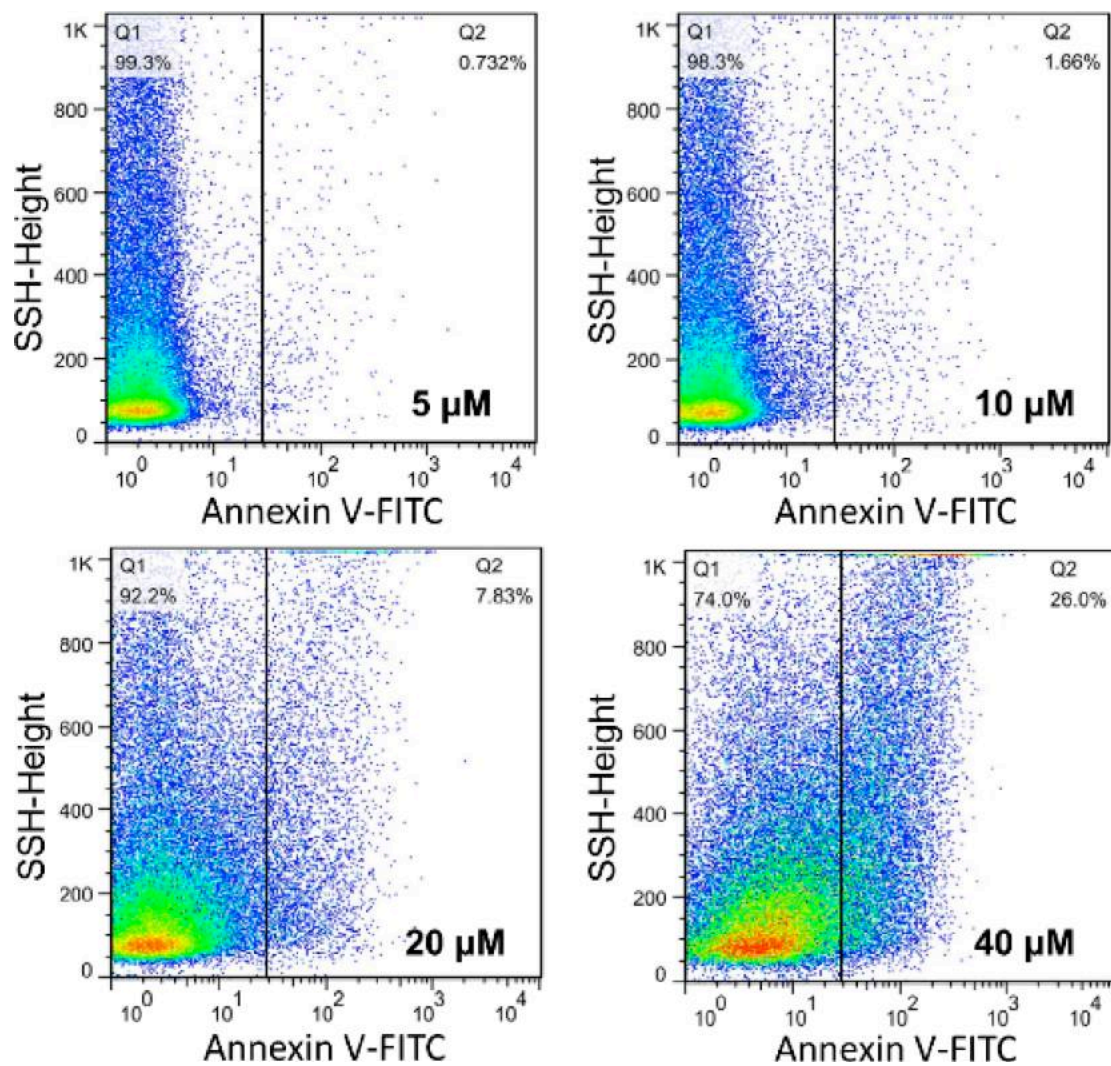

**Figure S4.** Percentage of annexin V positive cells after 24 hrs of incubation with W362 at 5  $\mu$ M, 10  $\mu$ M, 20  $\mu$ M, 40  $\mu$ M determined by flow cytometry.

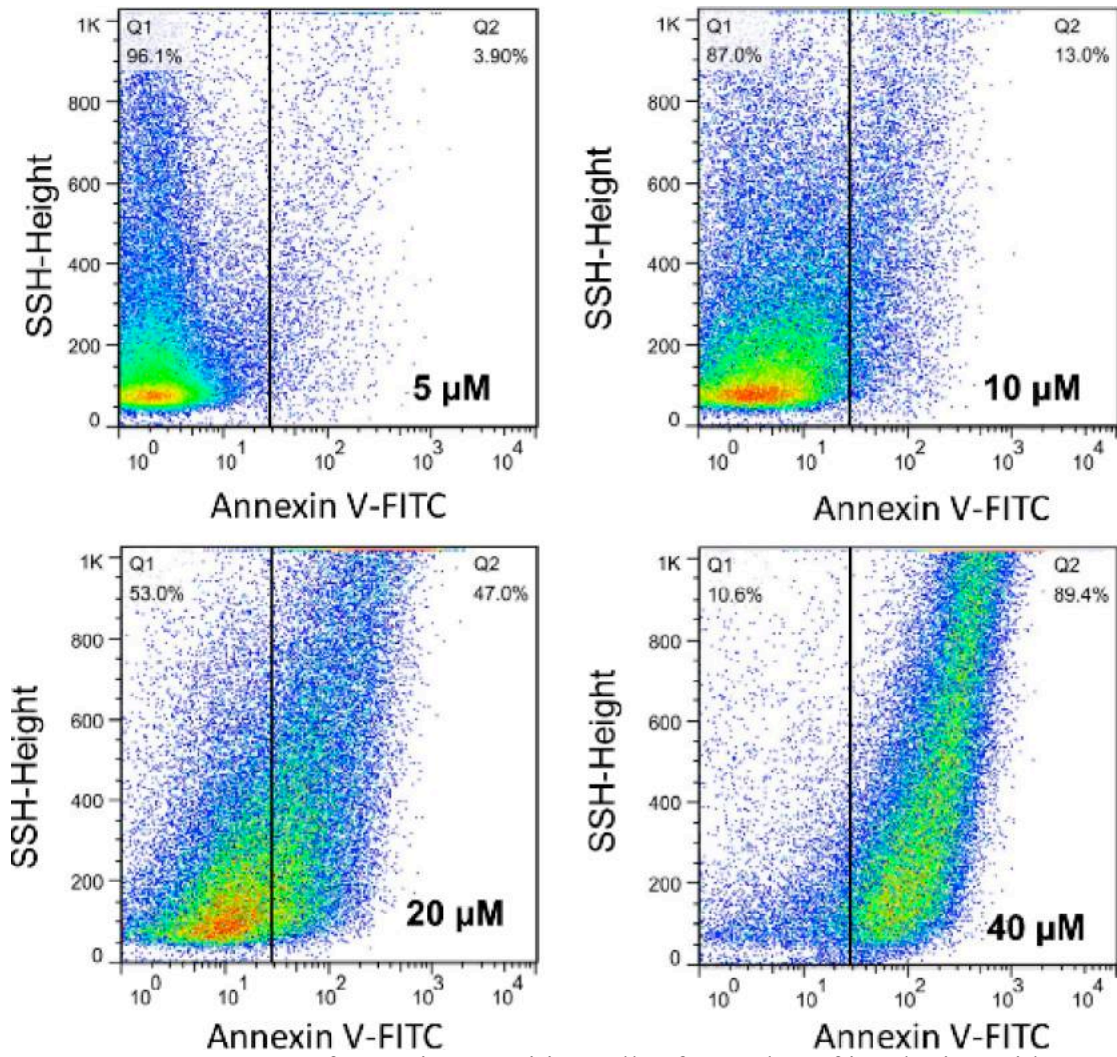

**Figure S5.** Percentage of annexin V positive cells after 24 hrs of incubation with 3W62 at 5  $\mu$ M, 10  $\mu$ M, 20  $\mu$ M, 40  $\mu$ M determined by flow cytometry.



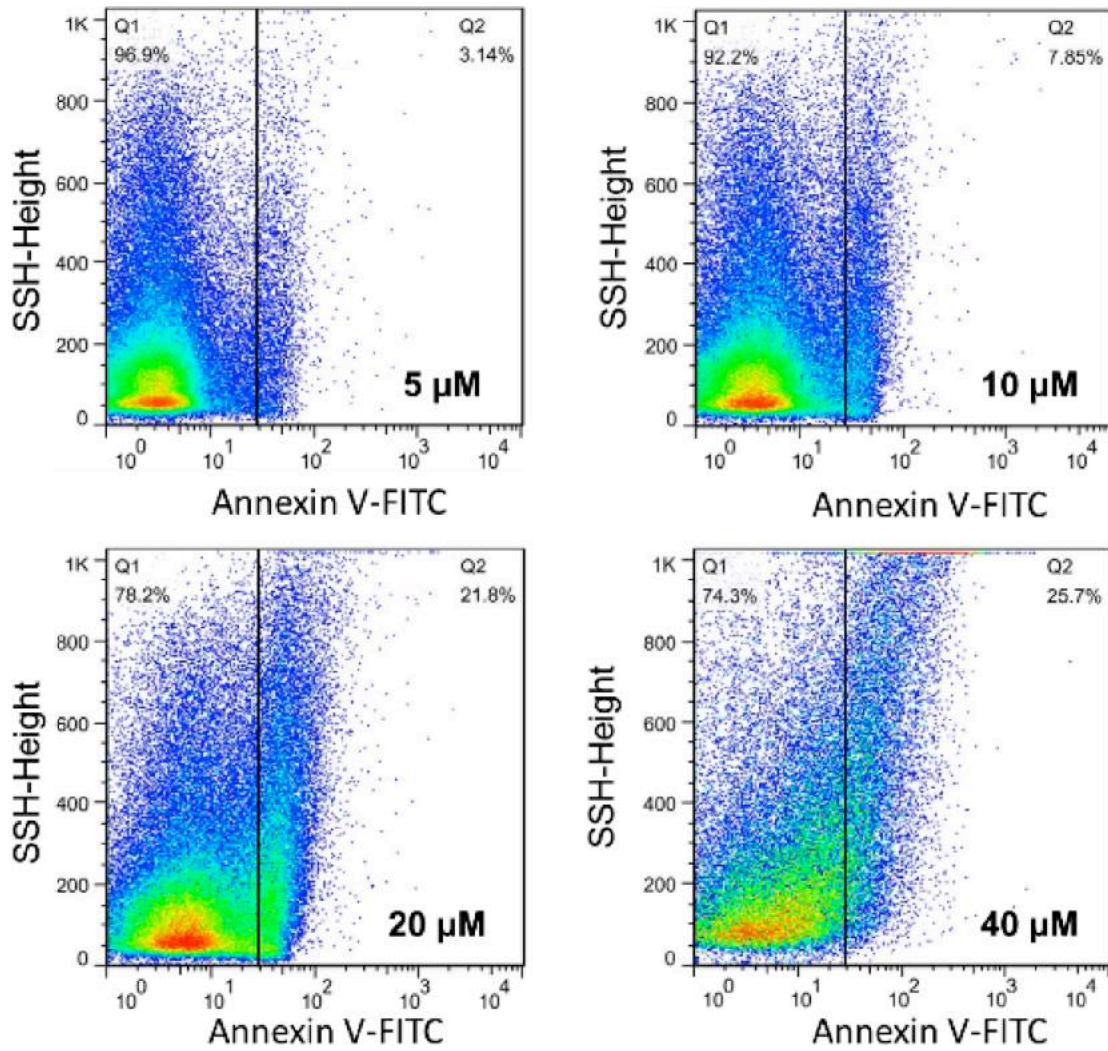

**Figure S6.** Percentage of annexin V positive cells after 24 hrs of incubation with P-W362 at 5  $\mu$ M, 10  $\mu$ M, 20  $\mu$ M, 40  $\mu$ M determined by flow cytometry.

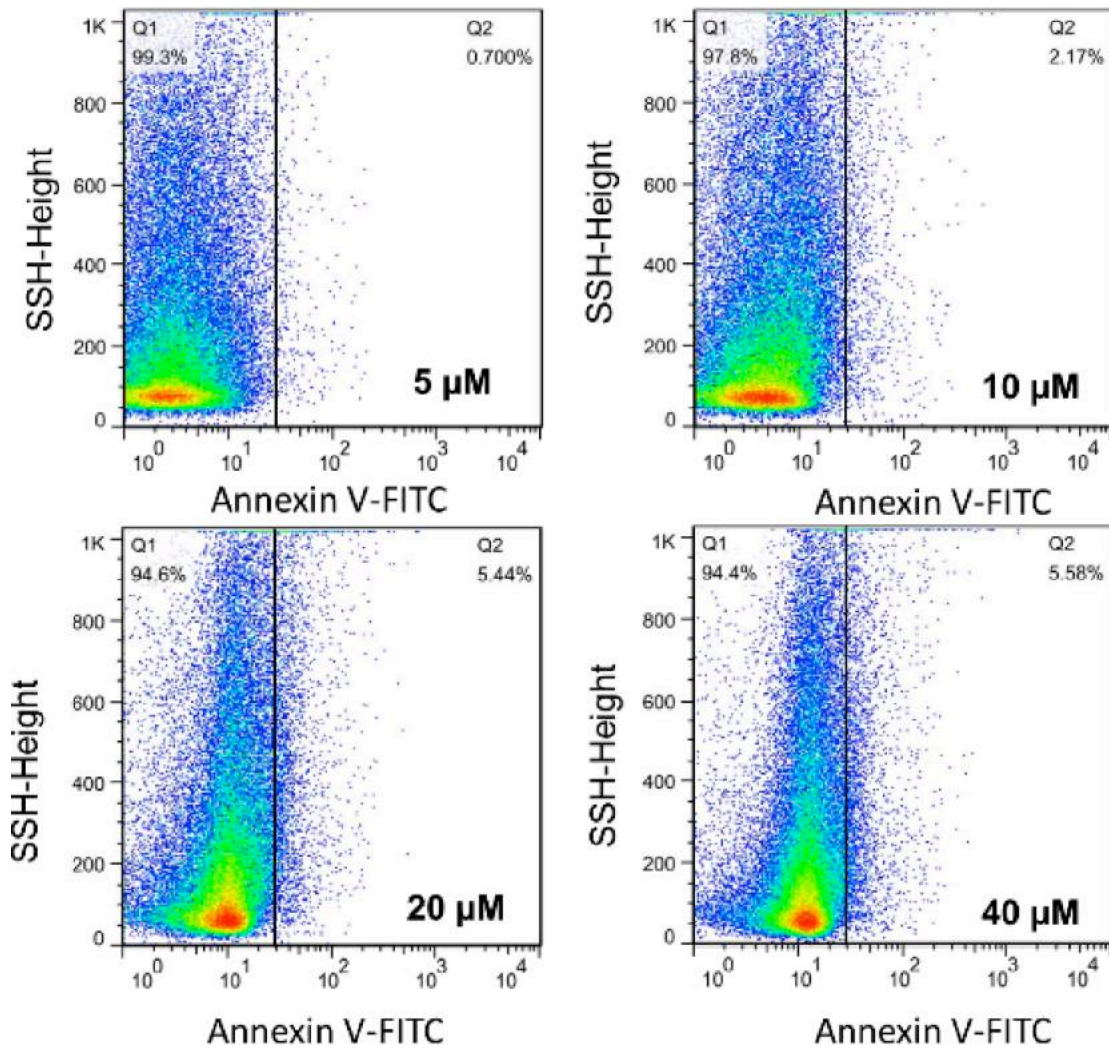

**Figure S7.** Percentage of annexin V positive cells after 24 hrs of incubation with P-3W62 at 5  $\mu$ M, 10  $\mu$ M, 20  $\mu$ M, 40  $\mu$ M determined by flow cytometry.

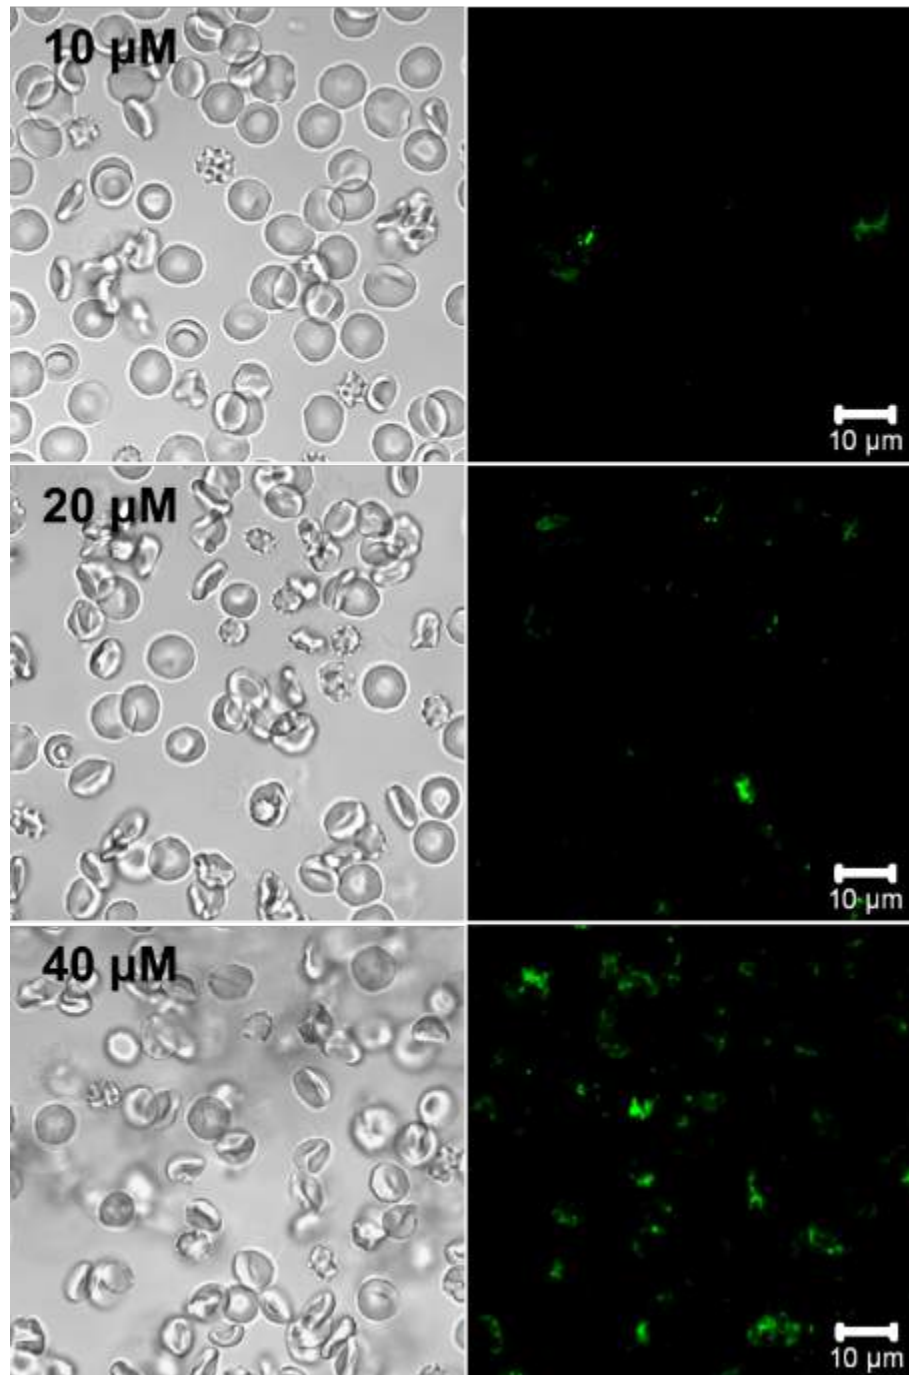

**Figure S8.** Confocal bright field and fluorescence images of fluorescein labeled annexin V positive RBCs after 24 hrs of incubation with W362 at 10  $\mu\text{M}$ , 20  $\mu\text{M}$ , 40  $\mu\text{M}$ .



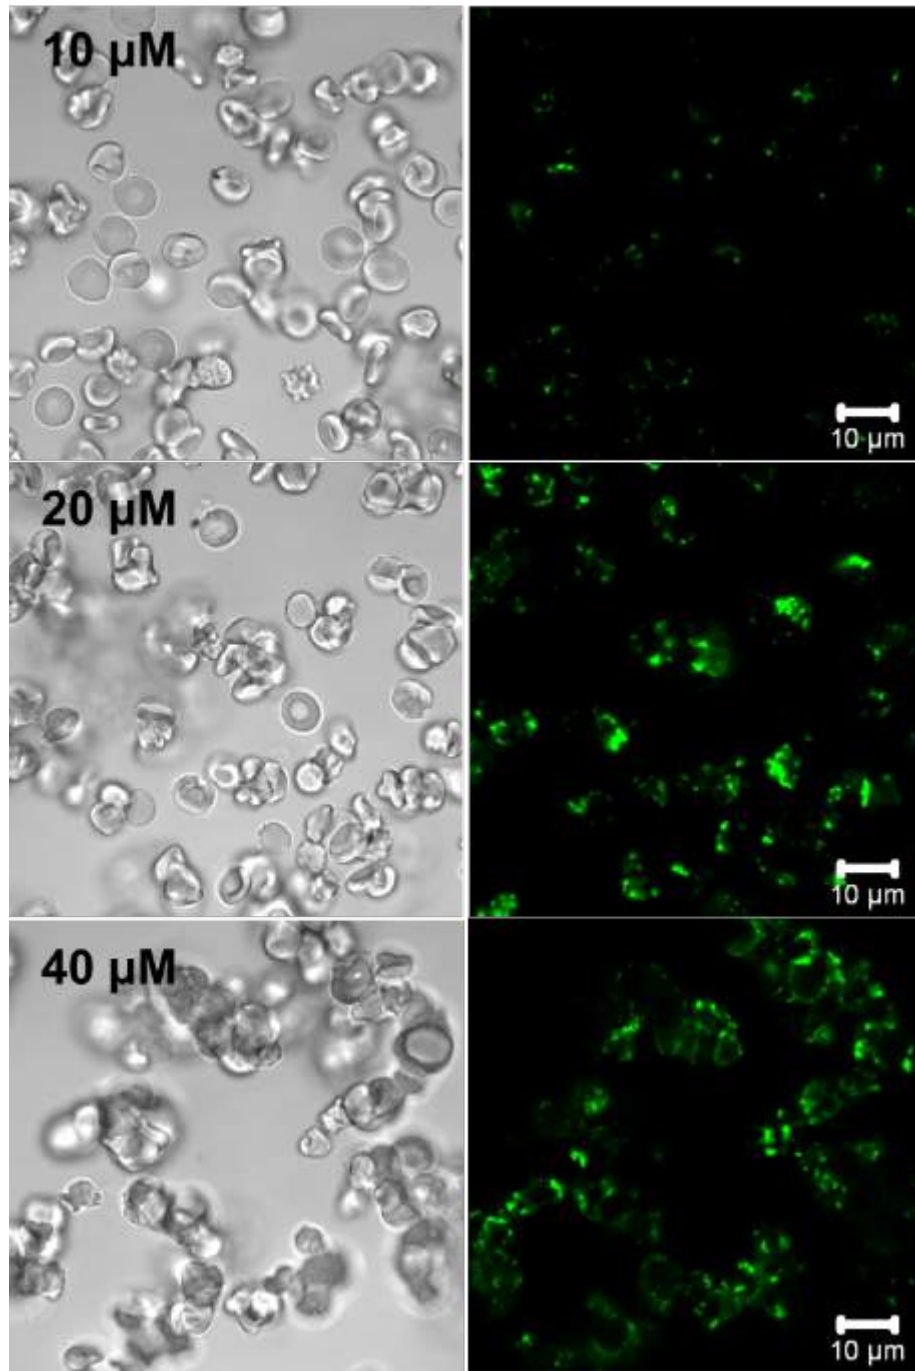

**Figure S9.** Confocal bright field and fluorescence images of fluorescein labeled annexin V positive RBCs after 24 hrs of incubation with 3W62 at 10  $\mu$ M, 20  $\mu$ M, 40  $\mu$ M.

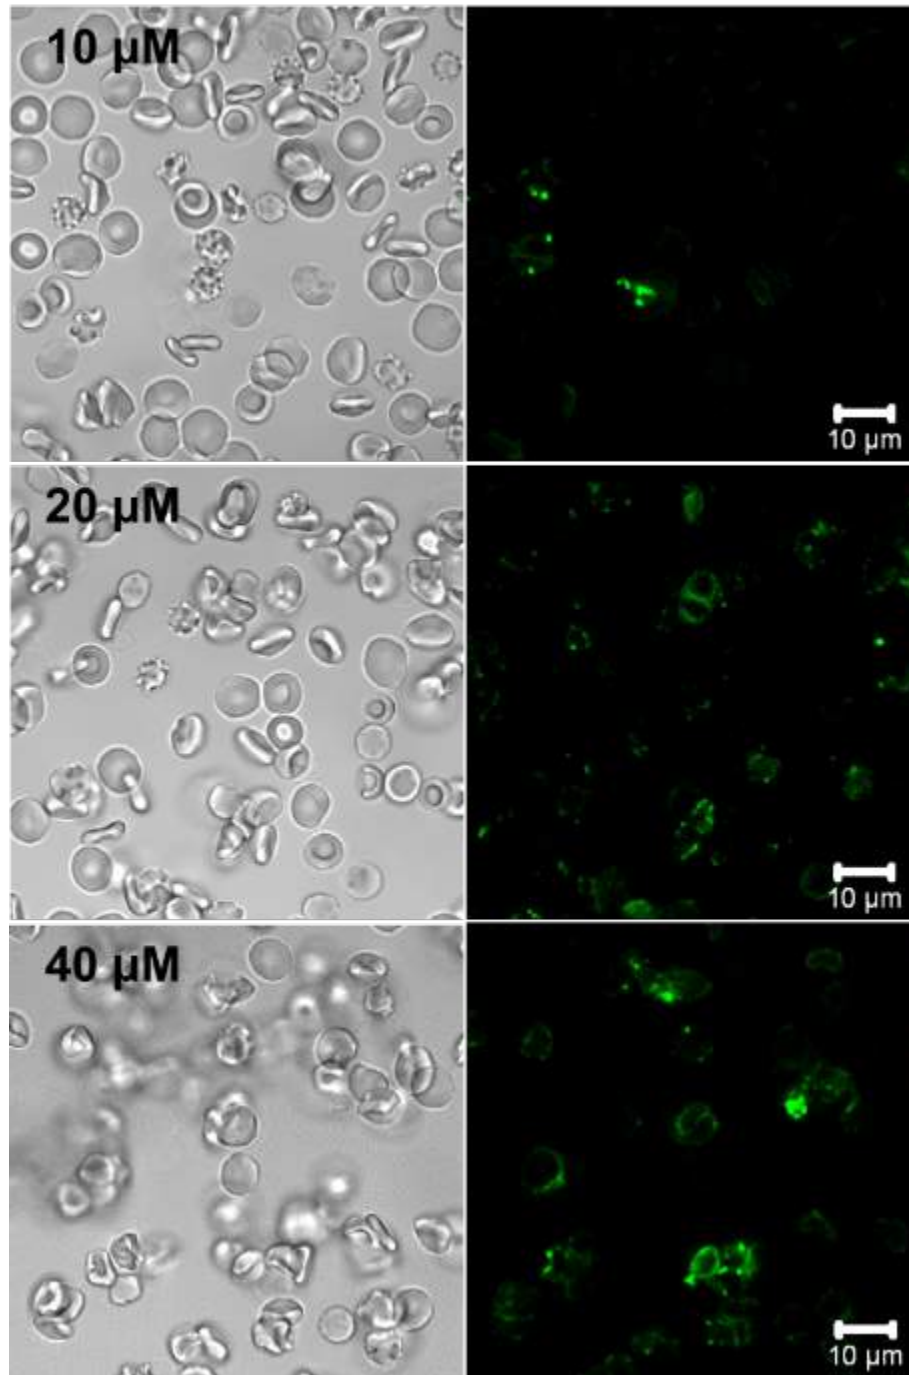

**Figure S10.** Confocal bright field and fluorescence images of fluorescein labeled annexin V positive RBCs after 24 hrs of incubation with P-W362 at 10  $\mu$ M, 20  $\mu$ M, 40  $\mu$ M.

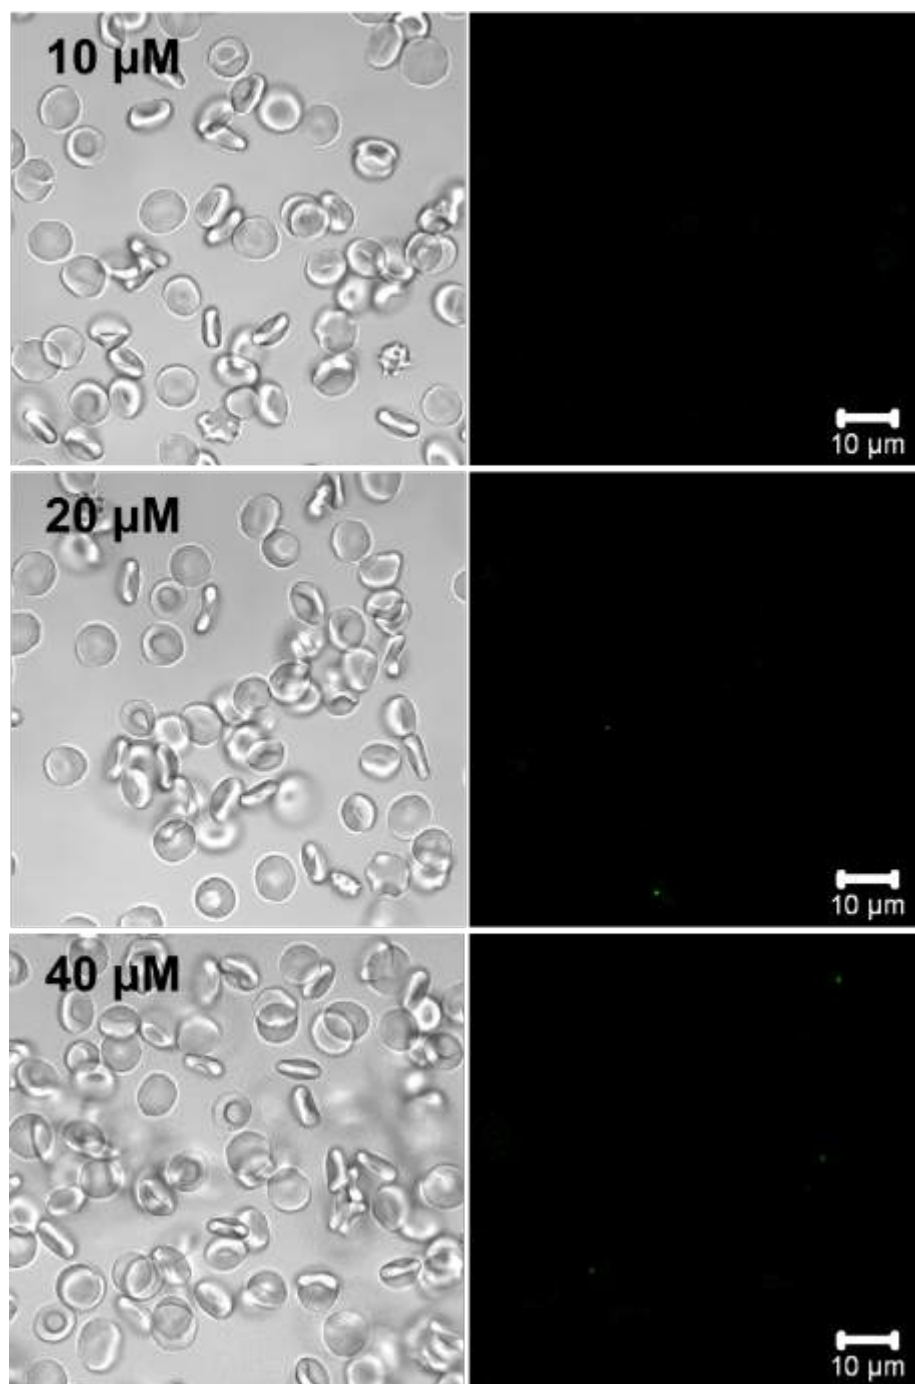

**Figure S11.** Confocal bright field and fluorescence images of fluorescein labeled annexin V positive RBCs after 24 hrs of incubation with P-3W62 at 10  $\mu\text{M}$ , 20  $\mu\text{M}$ , 40  $\mu\text{M}$ .

## References

1. P. Pernot, A. Round, R. Barrett, A. D. Antolinos, A. Gobbo, E. Gordon, J. Huet, J. Kieffer, M. Lentini, M. Mattenet, C. Morawe, C. Mueller-Dieckmann, S. Ohlsson, W. Schmid, J. Surr, P. Theveneau, L. Zerrad and S. McSweeney, *J. Synchrot. Radiat.*, 2013, **20**, 660-664.
2. O. Glatter, *J. Appl. Crystallogr.*, 1977, **10**, 415-421.
3. M. V. Petoukhov, D. Franke, A. V. Shkumatov, G. Tria, A. G. Kikhney, M. Gajda, C. Gorba, H. D. T. Mertens, P. V. Konarev and D. I. Svergun, *J. Appl. Crystallogr.*, 2012, **45**, 342-350.
